# Supplementary material for: Layer-by-Layer Assembly of Polystyrene/Ag for a Highly Reproducible SERS Substrate and Its Use for the Detection of Food Contaminants
Source: MDPI journal article supplement (doi:10.3390/polym13193270), 2021-09-25
Supplement: s1 [file s1]

Supplementary Information:

# Layer-by-layer Assembly of Polystyrene/Ag for a Highly Reproducible SERS Substrate and Its Use for the Detection of Food Contaminants

Sihan Zhang <sup>1</sup>, Zhihua Xu <sup>1</sup>, Jiaqi Guo <sup>2</sup>, Haiying Wang <sup>3</sup>, Yibo Ma <sup>4</sup>, Xianming Kong <sup>1,\*</sup>, Hongtao Fan <sup>1</sup> and Qian Yu <sup>1,\*</sup>

<sup>1</sup> School of Petrochemical Engineering, Liaoning Petrochemical University, Fushun 113001, China; h321065125@163.com (S.Z.); kxm.kxm@163.com (Z.X.); httyf\_77@163.com (H.F.)

<sup>2</sup> Jiangsu Co-Innovation Center for Efficient Processing and Utilization of Forest Resources and Joint International Research Lab of Lignocellulosic Functional Materials, Nanjing Forestry University, Nanjing 210037, China; jiaqi.guo@njfu.edu.cn

<sup>3</sup> School of Environmental Science, Nanjing Xiaozhuang University, Nanjing 210037, China; wanghaiying@nju.edu.cn

<sup>4</sup> Department of Bioproducts and Biosystems, School of Chemical Engineering, Aalto University, FI-00076 Aalto, Finland; yibo.ma@aalto.fi

\* Correspondence: xmkong@lnpu.edu.cn (X.K.); qyu@lnpu.edu.cn (Q.Y.)

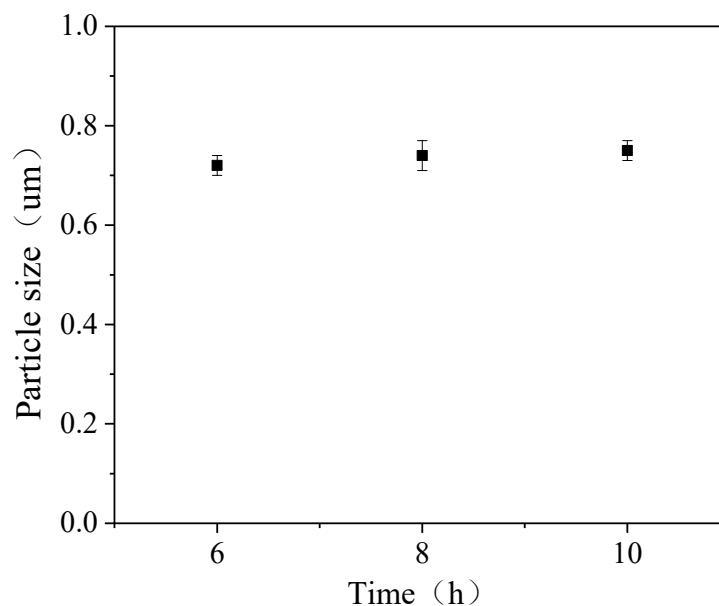

Figure S1. Relation of sphere particle size and reaction time.

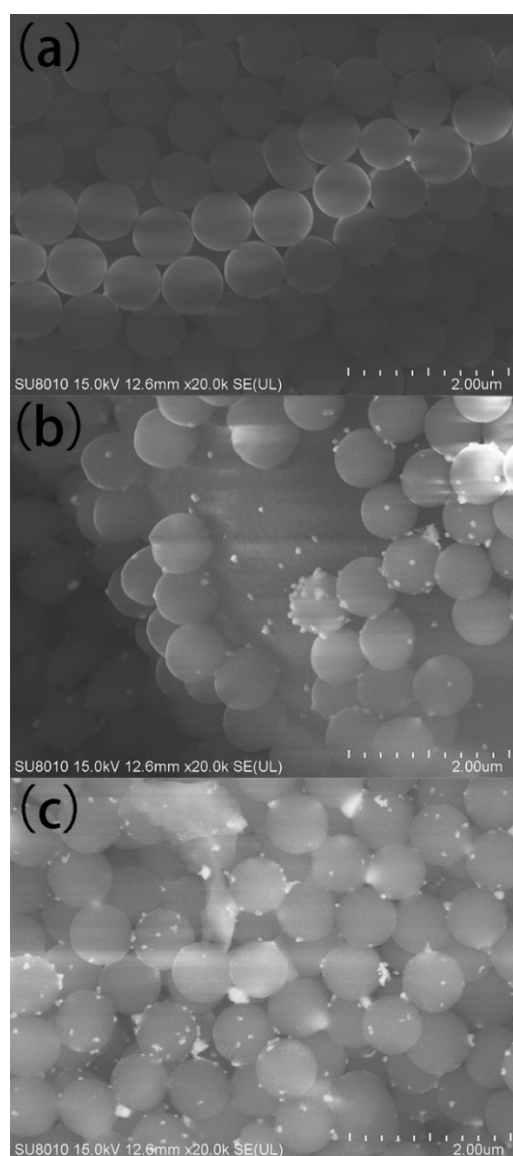

**Figure S2.** SEM images of colloidal PS/Ag with different volume of PS colloid, 400 uL (a), 100 uL (b), 50 uL (c).

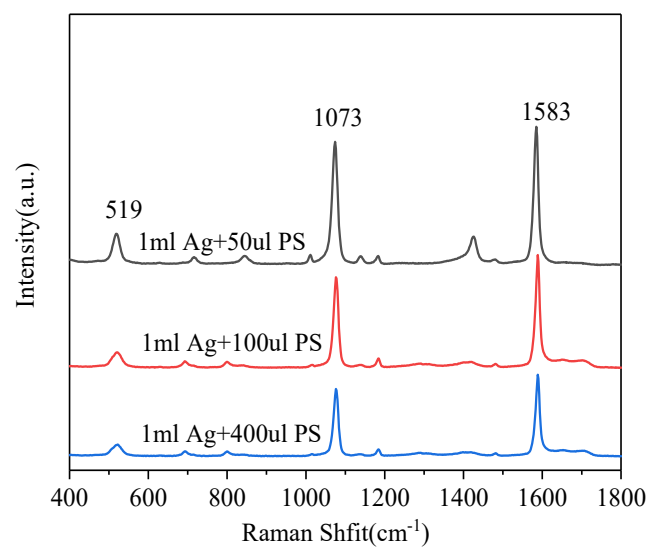

**Figure S3.** Raman spectra of MBA (100 ppm) on colloidal PS/Ag composites with different volumes of PS colloid.

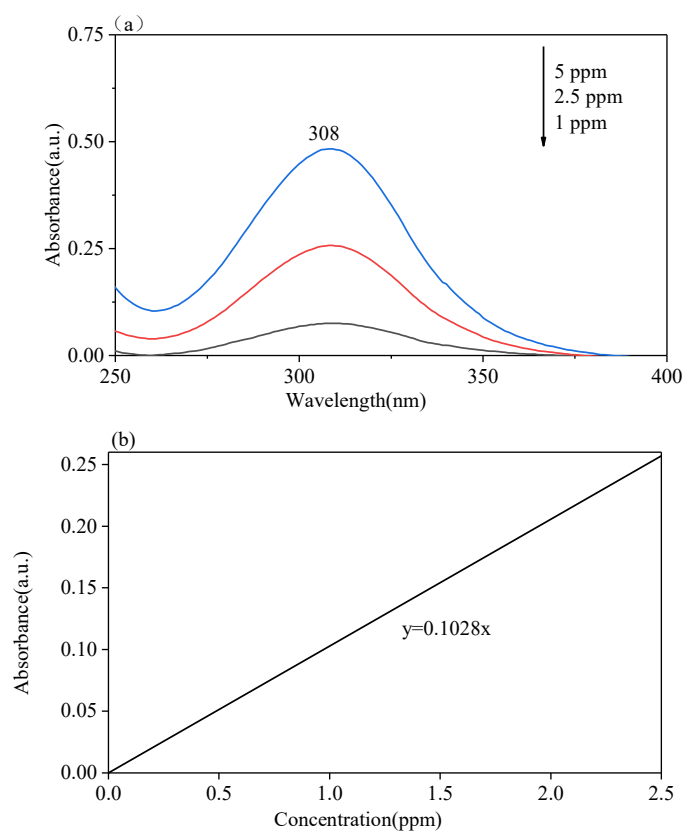

**Figure S4.** UV-vis spectra of different concentrations of DMZ(a), and the linear relationship between concentration and absorbance (b).

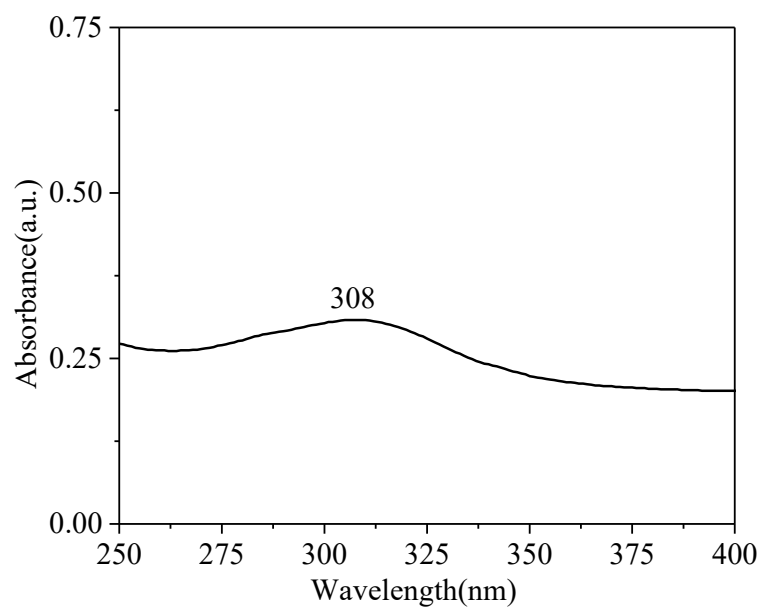

**Figure S5.** UV-vis spectra of DMZ (100 ppm) from real pork sample after 100-fold dilution.

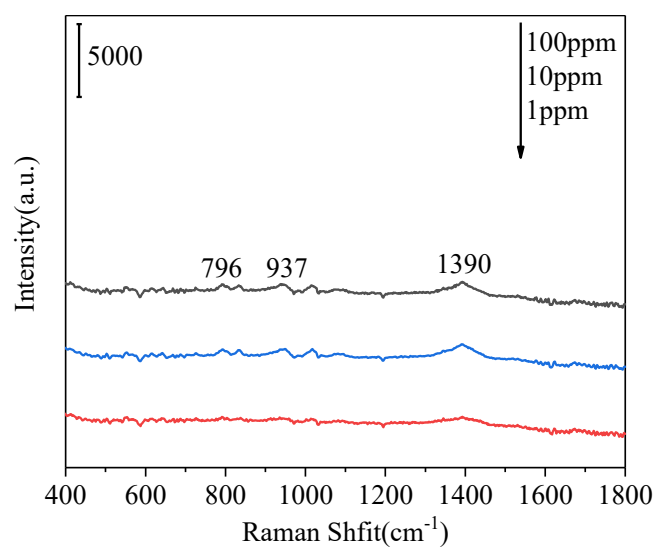

**Figure S6.** Raman spectra of different concentrations of DMZ from pork after washing with water.
